# Supplementary material for: Structural insights into zinc oxide–silver nanocomposite via different XRD models: rapid synthesis with photocatalytic & antibacterial applications
Source: Royal Society of Chemistry journal article supplement (doi:10.1039/d5na00790a), 2025-01-01
Supplement: d5na00790a1.pdf [file d5na00790a1.pdf]

## Supplementary Information

### **Structural Insights into Zinc Oxide-Silver Nanocomposite via different XRD models: Rapid Synthesis with Photocatalytic & Antibacterial Applications**

Md. Abdus Samad Azad <sup>a</sup>, Md. Shahadat Hossain <sup>b</sup>, Shassatha Paul Saikat <sup>a</sup>, Md. Rifat Hasan <sup>a</sup>, Shukanta Bhowmik <sup>a\*</sup>

<sup>a</sup>Department of Applied Chemistry and Chemical Engineering, Noakhali Science and Technology University, Noakhali-3814, Bangladesh

<sup>b</sup>Department of Applied Chemistry, Noakhali Science and Technology University, Noakhali-3814, Bangladesh

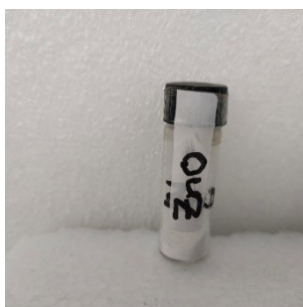

**Figure S1:** Synthesised ZnO nanoparticles by sol-gel method

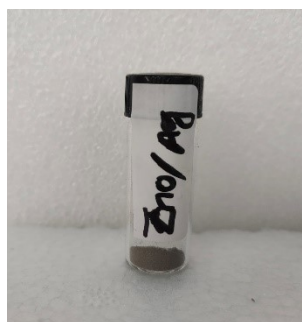

**Figure S2:** Synthesised ZnO/Ag NC by ultrasonic irradiation method

#### **Photocatalytic experiments:**

The photocatalytic degradation rate of MB aqueous solution was calculated by the formula:

$$\% \text{ Degradation} = \frac{C_0 - C}{C_0} \times 100\% = \frac{A_0 - A}{A_0} \times 100\%$$

Where  $C_0$  and  $C$  are the initial and final/post-irradiation concentration of the dye, respectively; and  $A_0$  and  $A$  are the initial and final/post-irradiation absorbance of MB solution at 660nm as measured by the UV-Vis spectrophotometer, respectively.

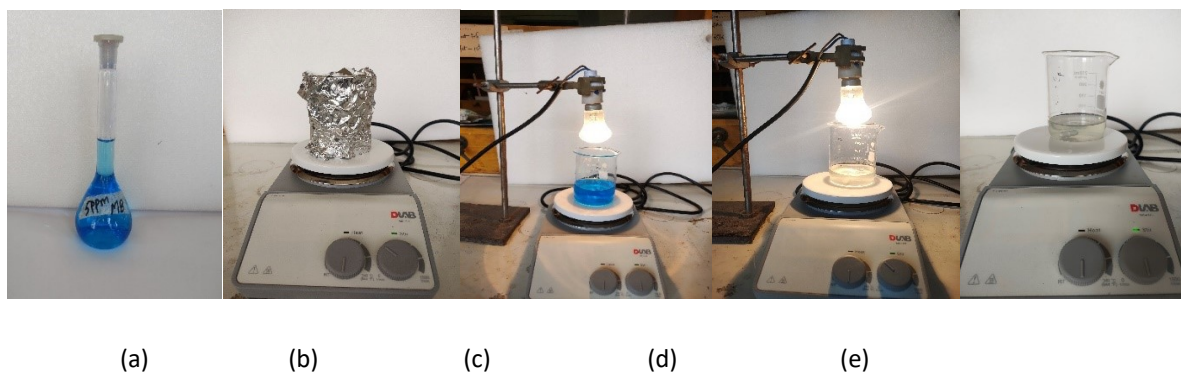

**Figure S3:** Photocatalytic activity of ZnO/Ag (a) 5 ppm MB solution, (b) 50 mg ZnO/Ag added in MB solution stirring 30 min in dark condition, (c) after 150 min of ZnO/Ag adding, (d) after 330 min of ZnO/Ag adding, and (e) 98.42% MB degraded by ZnO/Ag NC.

**Table S1:** The specific values of  $\beta$  (full width at half maximum) and  $\theta$  (Bragg angle) used in the crystallite size calculation based on the Scherrer equation

| $\beta$ ° | $\theta$ (deg) |
|-----------|----------------|
| 0.1959    | 15.4775        |
| 0.1162    | 15.8783        |
| 0.1066    | 17.20505       |
| 0.1081    | 18.1198        |
| 0.1467    | 19.0512        |
| 0.2153    | 22.13375       |
| 0.1068    | 23.76425       |
| 0.1059    | 28.2911        |
| 0.11      | 31.4262        |
| 0.2332    | 32.20395       |
| 0.0899    | 33.17685       |
| 0.1125    | 33.9674        |
| 0.1161    | 34.54225       |
| 0.1122    | 36.2796        |
| 0.1179    | 38.4783        |

**Table S2:** Meaning of the symbols used in the XRD models

| Symbols                 | Meaning                                                        |
|-------------------------|----------------------------------------------------------------|
| D                       | Crystalline size obtained from the Scherrer equation           |
| $D_L$ , $D_c$           | Crystalline size obtained from the linear straight line method |
| K, $K_a$ , $K_b$        | The shape factor (0.94) used in the calculation                |
| $\beta_L$ and $\beta_G$ | Lorentzian and Gaussian functions' full widths at half maximum |
| $X_c$                   | Crystallinity degree                                           |
| $\delta$                | Dislocation density                                            |
| $\epsilon$              | Microstrain                                                    |
| $Y_{hkl}$               | Young's modulus                                                |
